# Supplementary material
Source: publisher figshare collection journal article supplement (https://acs.figshare.com/ndownloader/files/5103259)
Supplement: Supplementary file 1 [file 5103259]

 
data_jr03 
 
_audit_creation_method            SHELXL-97 
_chemical_name_systematic 
; 
 ? 
; 
_chemical_name_common             ? 
_chemical_melting_point           ? 
_chemical_formula_moiety          ? 
_chemical_formula_sum 
 'C11 H18 O4 S' 
_chemical_formula_weight          246.31 
 
loop_ 
 _atom_type_symbol 
 _atom_type_description 
 _atom_type_scat_dispersion_real 
 _atom_type_scat_dispersion_imag 
 _atom_type_scat_source 
 'C'  'C'   0.0033   0.0016 
 'International Tables Vol C Tables 4.2.6.8 and 6.1.1.4' 
 'H'  'H'   0.0000   0.0000 
 'International Tables Vol C Tables 4.2.6.8 and 6.1.1.4' 
 'O'  'O'   0.0106   0.0060 
 'International Tables Vol C Tables 4.2.6.8 and 6.1.1.4' 
 'S'  'S'   0.1246   0.1234 
 'International Tables Vol C Tables 4.2.6.8 and 6.1.1.4' 
 
_symmetry_cell_setting            triclinic 
_symmetry_space_group_name_H-M    P-1
 
loop_ 
 _symmetry_equiv_pos_as_xyz 
 'x, y, z' 
 '-x, -y, -z' 
 
_cell_length_a                    12.1189(13) 
_cell_length_b                    14.4813(15) 
_cell_length_c                    15.0400(16) 
_cell_angle_alpha                 80.519(9) 
_cell_angle_beta                  78.775(9) 
_cell_angle_gamma                 67.896(8) 
_cell_volume                      2386.5(4) 
_cell_formula_units_Z             8 
_cell_measurement_temperature     293(2) 
_cell_measurement_reflns_used     25 
_cell_measurement_theta_min       10.24 
_cell_measurement_theta_max       12.53 
 
_exptl_crystal_description        prism 
_exptl_crystal_colour             colourless
_exptl_crystal_size_max           0.44
_exptl_crystal_size_mid           0.38
_exptl_crystal_size_min           0.32
_exptl_crystal_density_meas       ? 
_exptl_crystal_density_diffrn     1.371 
_exptl_crystal_density_method     'not measured' 
_exptl_crystal_F_000              1056 
_exptl_absorpt_coefficient_mu     0.268 
_exptl_absorpt_correction_type    none
_exptl_absorpt_correction_T_min   ? 
_exptl_absorpt_correction_T_max   ? 
_exptl_absorpt_process_details    ? 
 
_exptl_special_details 
; 
 ? 
; 
 
_diffrn_ambient_temperature       293(2) 
_diffrn_radiation_wavelength      0.71073 
_diffrn_radiation_type            MoK\a 
_diffrn_radiation_source          'fine-focus sealed tube' 
_diffrn_radiation_monochromator   graphite 
_diffrn_measurement_device_type   'Nonius CAD4' 
_diffrn_measurement_method        \w-scans
_diffrn_detector_area_resol_mean  ? 
_diffrn_standards_number          3
_diffrn_standards_interval_count  ? 
_diffrn_standards_interval_time   3600 
_diffrn_standards_decay_%         1.6 
_diffrn_reflns_number             8832 
_diffrn_reflns_av_R_equivalents   0.0133 
_diffrn_reflns_av_sigmaI/netI     0.0269 
_diffrn_reflns_limit_h_min        -14 
_diffrn_reflns_limit_h_max        14 
_diffrn_reflns_limit_k_min        -17 
_diffrn_reflns_limit_k_max        16 
_diffrn_reflns_limit_l_min        -17 
_diffrn_reflns_limit_l_max        1 
_diffrn_reflns_theta_min          1.39 
_diffrn_reflns_theta_max          24.97 
_reflns_number_total              8382 
_reflns_number_gt                 5420 
_reflns_threshold_expression      >2sigma(I) 
 
_computing_data_collection        'CAD4/PC v2.0 (Nonius, 1996)' 
_computing_cell_refinement        'CAD4/PC v2.0 (Nonius, 1996)' 
_computing_data_reduction         'Open MoleN v2.2 (Nonius, 1997)' 
_computing_structure_solution     'SHELXS-97 (Sheldrick, 1990)' 
_computing_structure_refinement   'SHELXL-97 (Sheldrick, 1997)' 
_computing_molecular_graphics     'SHELXTL v6.14 (Bruker, 2000-2003)' 
_computing_publication_material   'SHELXL-97 (Sheldrick, 1997)' 
 
_refine_special_details 
; 
 Refinement of F^2^ against ALL reflections.  The weighted R-factor wR and 
 goodness of fit S are based on F^2^, conventional R-factors R are based 
 on F, with F set to zero for negative F^2^. The threshold expression of 
 F^2^ > 2sigma(F^2^) is used only for calculating R-factors(gt) etc. and is 
 not relevant to the choice of reflections for refinement.  R-factors based 
 on F^2^ are statistically about twice as large as those based on F, and R- 
 factors based on ALL data will be even larger. 
 The O1, O1B, O4B, C11B and C11c atoms are disordered over two sites.
 The O4B, C11B and C11C atoms have beeing refined isotropically.

; 
 
_refine_ls_structure_factor_coef  Fsqd  
_refine_ls_matrix_type            full 
_refine_ls_weighting_scheme       calc  
_refine_ls_weighting_details 
 'calc w=1/[\s^2^(Fo^2^)+(0.0524P)^2^+2.6095P] where P=(Fo^2^+2Fc^2^)/3' 
_atom_sites_solution_primary      direct 
_atom_sites_solution_secondary    difmap 
_atom_sites_solution_hydrogens    geom 
_refine_ls_hydrogen_treatment     constr 
_refine_ls_extinction_method      none 
_refine_ls_extinction_coef        ? 
_refine_ls_number_reflns          8382 
_refine_ls_number_parameters      613 
_refine_ls_number_restraints      711 
_refine_ls_R_factor_all           0.0912 
_refine_ls_R_factor_gt            0.0493 
_refine_ls_wR_factor_ref          0.1510 
_refine_ls_wR_factor_gt           0.1215 
_refine_ls_goodness_of_fit_ref    1.049 
_refine_ls_restrained_S_all       1.056 
_refine_ls_shift/su_max           0.000 
_refine_ls_shift/su_mean          0.000 
 
loop_ 
 _atom_site_label 
 _atom_site_type_symbol 
 _atom_site_fract_x 
 _atom_site_fract_y 
 _atom_site_fract_z 
 _atom_site_U_iso_or_equiv 
 _atom_site_adp_type 
 _atom_site_occupancy 
 _atom_site_symmetry_multiplicity 
 _atom_site_calc_flag 
 _atom_site_refinement_flags 
 _atom_site_disorder_assembly 
 _atom_site_disorder_group 
S1 S -0.16893(8) 0.91692(6) 0.27256(6) 0.0552(2) Uani 1 1 d DU . . 
O1 O 0.2058(13) 0.5814(13) 0.4639(7) 0.073(3) Uani 0.58(5) 1 d PDU A 1 
H1 H 0.1573(16) 0.6133(15) 0.5039(11) 0.109 Uiso 0.58(5) 1 calc PRD A 1 
O1Z O 0.172(3) 0.5511(18) 0.4739(9) 0.085(6) Uani 0.42(5) 1 d PDU A 2 
H1Z H 0.169(3) 0.592(2) 0.5064(11) 0.127 Uiso 0.42(5) 1 calc PRD A 2 
O2 O -0.0909(2) 0.81378(16) 0.31655(14) 0.0586(6) Uani 1 1 d U . . 
O3 O -0.1003(2) 0.95079(18) 0.19500(17) 0.0689(7) Uani 1 1 d DU . . 
O4 O -0.2207(3) 0.9781(2) 0.3450(2) 0.0897(10) Uani 1 1 d DU . . 
C1 C -0.0231(3) 0.6373(2) 0.2985(2) 0.0483(7) Uani 1 1 d U . . 
H01 H -0.1074 0.6430 0.3047 0.058 Uiso 1 1 calc R . . 
C2 C -0.0100(3) 0.7352(2) 0.25675(19) 0.0440(7) Uani 1 1 d U . . 
H2 H -0.0345 0.7517 0.1960 0.053 Uiso 1 1 calc R . . 
C3 C 0.1173(3) 0.7301(3) 0.2495(2) 0.0548(8) Uani 1 1 d U . . 
H3 H 0.1231 0.7951 0.2239 0.066 Uiso 1 1 calc R . . 
C4 C 0.1587(3) 0.7013(3) 0.3425(3) 0.0670(10) Uani 1 1 d U A . 
H4A H 0.2413 0.6977 0.3369 0.080 Uiso 1 1 calc R . . 
H4B H 0.1088 0.7519 0.3829 0.080 Uiso 1 1 calc R . . 
C5 C 0.1496(3) 0.6008(3) 0.3817(2) 0.0674(11) Uani 1 1 d DU . . 
C6 C 0.2283(4) 0.5206(3) 0.3186(2) 0.0777(13) Uani 1 1 d U A . 
H6A H 0.3118 0.5146 0.3126 0.093 Uiso 1 1 calc R . . 
H6B H 0.2223 0.4563 0.3440 0.093 Uiso 1 1 calc R . . 
C7 C 0.1863(3) 0.5497(3) 0.2252(2) 0.0578(9) Uani 1 1 d U . . 
H7 H 0.2370 0.4986 0.1845 0.069 Uiso 1 1 calc R A . 
C8 C 0.0560(3) 0.5578(2) 0.2338(2) 0.0567(8) Uani 1 1 d U A . 
H8A H 0.0487 0.4935 0.2576 0.068 Uiso 1 1 calc R . . 
H8B H 0.0296 0.5765 0.1744 0.068 Uiso 1 1 calc R . . 
C9 C 0.0196(3) 0.6081(2) 0.3914(2) 0.0591(9) Uani 1 1 d U A . 
H9A H -0.0307 0.6579 0.4324 0.071 Uiso 1 1 calc R . . 
H9B H 0.0128 0.5441 0.4171 0.071 Uiso 1 1 calc R . . 
C10 C 0.1959(3) 0.6501(3) 0.1855(2) 0.0629(9) Uani 1 1 d U A . 
H10A H 0.1695 0.6685 0.1261 0.076 Uiso 1 1 calc R . . 
H10B H 0.2790 0.6456 0.1780 0.076 Uiso 1 1 calc R . . 
C11 C -0.2803(3) 0.8911(3) 0.2344(3) 0.0713(11) Uani 1 1 d D . . 
H11A H -0.3205 0.8592 0.2840 0.107 Uiso 1 1 calc R . . 
H11B H -0.2442 0.8473 0.1869 0.107 Uiso 1 1 calc R . . 
H11C H -0.3376 0.9524 0.2112 0.107 Uiso 1 1 calc R . . 
S1A S 0.52073(8) 0.22284(8) 0.21652(5) 0.0616(3) Uani 1 1 d DU . . 
O1A O 0.3338(3) 0.4174(2) 0.57330(16) 0.0826(9) Uani 1 1 d DU . . 
H1A H 0.2970 0.4552 0.5333 0.124 Uiso 1 1 calc RD . . 
O2A O 0.4932(2) 0.26807(18) 0.30909(14) 0.0674(7) Uani 1 1 d U . . 
O3A O 0.4445(3) 0.2977(3) 0.16039(18) 0.1022(12) Uani 1 1 d DU . . 
O4A O 0.5150(3) 0.1250(2) 0.2309(2) 0.0798(8) Uani 1 1 d DU . . 
C1A C 0.4673(3) 0.1782(2) 0.4598(2) 0.0534(8) Uani 1 1 d U . . 
H01A H 0.4311 0.1396 0.4352 0.064 Uiso 1 1 calc R . . 
C2A C 0.5561(3) 0.2074(2) 0.38630(19) 0.0509(8) Uani 1 1 d U . . 
H2A H 0.6203 0.1468 0.3648 0.061 Uiso 1 1 calc R . . 
C3A C 0.6102(3) 0.2702(2) 0.4213(2) 0.0512(8) Uani 1 1 d U . . 
H3A H 0.6651 0.2905 0.3722 0.061 Uiso 1 1 calc R . . 
C4A C 0.5107(3) 0.3632(2) 0.4590(2) 0.0545(8) Uani 1 1 d U . . 
H4AA H 0.5462 0.4023 0.4827 0.065 Uiso 1 1 calc R . . 
H4AB H 0.4669 0.4048 0.4105 0.065 Uiso 1 1 calc R . . 
C5A C 0.4250(3) 0.3316(2) 0.5343(2) 0.0529(8) Uani 1 1 d DU . . 
C6A C 0.4943(3) 0.2676(3) 0.6107(2) 0.0605(9) Uani 1 1 d U . . 
H6AB H 0.4397 0.2480 0.6595 0.073 Uiso 1 1 calc R . . 
H6AC H 0.5298 0.3061 0.6351 0.073 Uiso 1 1 calc R . . 
C7A C 0.5931(3) 0.1744(2) 0.5743(2) 0.0549(8) Uani 1 1 d U . . 
H7A H 0.6373 0.1334 0.6236 0.066 Uiso 1 1 calc R . . 
C8A C 0.5379(3) 0.1135(2) 0.5360(2) 0.0575(9) Uani 1 1 d U . . 
H8AA H 0.4845 0.0913 0.5840 0.069 Uiso 1 1 calc R . . 
H8AB H 0.6009 0.0547 0.5122 0.069 Uiso 1 1 calc R . . 
C9A C 0.3688(3) 0.2717(3) 0.4969(2) 0.0563(8) Uani 1 1 d U . . 
H9AA H 0.3242 0.3125 0.4486 0.068 Uiso 1 1 calc R . . 
H9AB H 0.3131 0.2521 0.5447 0.068 Uiso 1 1 calc R . . 
C10A C 0.6795(3) 0.2057(3) 0.4980(2) 0.0577(9) Uani 1 1 d U . . 
H10C H 0.7426 0.1467 0.4747 0.069 Uiso 1 1 calc R . . 
H10D H 0.7168 0.2435 0.5217 0.069 Uiso 1 1 calc R . . 
C11A C 0.6699(3) 0.2111(3) 0.1763(3) 0.0709(10) Uani 1 1 d D . . 
H11D H 0.6786 0.2747 0.1742 0.106 Uiso 1 1 calc R . . 
H11E H 0.6919 0.1895 0.1162 0.106 Uiso 1 1 calc R . . 
H11F H 0.7214 0.1627 0.2163 0.106 Uiso 1 1 calc R . . 
S1B S -0.10526(12) 0.83776(8) 0.97438(6) 0.0758(3) Uani 1 1 d DU . . 
O1B O 0.0431(17) 0.6513(7) 0.6240(9) 0.074(4) Uani 0.49(4) 1 d PDU B 1 
H1B H 0.0764(18) 0.6124(11) 0.6646(13) 0.112 Uiso 0.49(4) 1 calc PRD B 1 
O1BZ O 0.099(2) 0.6773(14) 0.6091(7) 0.101(6) Uani 0.51(4) 1 d PDU B 2 
H1BZ H 0.106(2) 0.6220(18) 0.6350(9) 0.152 Uiso 0.51(4) 1 calc PRD B 2 
O2B O -0.0770(2) 0.80685(17) 0.87687(15) 0.0632(7) Uani 1 1 d U C . 
O3B O -0.0677(3) 0.7511(2) 1.03272(18) 0.0821(8) Uani 1 1 d DU C . 
O4B O -0.2401(4) 0.8866(3) 0.9896(3) 0.085(2) Uani 0.655(7) 1 d PDU C 1 
C11B C -0.0563(8) 0.9305(6) 0.9709(6) 0.107(3) Uiso 0.655(7) 1 d PDU C 1 
H11G H -0.0888 0.9624 1.0262 0.160 Uiso 0.655(7) 1 calc PR C 1 
H11H H -0.0817 0.9784 0.9199 0.160 Uiso 0.655(7) 1 calc PR C 1 
H11I H 0.0300 0.9046 0.9647 0.160 Uiso 0.655(7) 1 calc PR C 1 
O4BZ O -0.1804(9) 0.9355(7) 0.9889(7) 0.092(4) Uiso 0.345(7) 1 d PDU C 2 
C1BZ C 0.0326(9) 0.8673(9) 0.9770(8) 0.065(3) Uiso 0.345(7) 1 d PDU C 2 
H11J H 0.0250 0.8935 1.0334 0.098 Uiso 0.345(7) 1 calc PR C 2 
H11K H 0.0405 0.9162 0.9271 0.098 Uiso 0.345(7) 1 calc PR C 2 
H11L H 0.1026 0.8074 0.9718 0.098 Uiso 0.345(7) 1 calc PR C 2 
C1B C -0.1951(3) 0.8313(3) 0.7582(3) 0.0629(9) Uani 1 1 d U C . 
H01B H -0.2592 0.8190 0.8038 0.075 Uiso 1 1 calc R . . 
C2B C -0.1296(3) 0.8782(2) 0.7999(2) 0.0544(8) Uani 1 1 d U . . 
H2B H -0.1858 0.9413 0.8226 0.065 Uiso 1 1 calc R C . 
C3B C -0.0291(3) 0.8972(3) 0.7321(2) 0.0620(9) Uani 1 1 d U C . 
H3B H 0.0143 0.9262 0.7610 0.074 Uiso 1 1 calc R . . 
C4B C 0.0566(3) 0.7990(3) 0.6959(2) 0.0725(11) Uani 1 1 d U . . 
H4BA H 0.1201 0.8112 0.6509 0.087 Uiso 1 1 calc R C . 
H4BB H 0.0934 0.7529 0.7454 0.087 Uiso 1 1 calc R . . 
C5B C -0.0114(4) 0.7533(3) 0.6532(2) 0.0803(13) Uani 1 1 d DU B . 
C6B C -0.0648(4) 0.8261(3) 0.5732(3) 0.0896(15) Uani 1 1 d U . . 
H6BA H -0.0009 0.8383 0.5287 0.108 Uiso 1 1 calc R C . 
H6BB H -0.1071 0.7974 0.5437 0.108 Uiso 1 1 calc R . . 
C7B C -0.1514(3) 0.9241(3) 0.6089(2) 0.0630(9) Uani 1 1 d U C . 
H7B H -0.1871 0.9705 0.5582 0.076 Uiso 1 1 calc R . . 
C8B C -0.2503(3) 0.9055(3) 0.6796(3) 0.0768(11) Uani 1 1 d U . . 
H8BA H -0.2963 0.8785 0.6520 0.092 Uiso 1 1 calc R C . 
H8BB H -0.3046 0.9681 0.7026 0.092 Uiso 1 1 calc R . . 
C9B C -0.1097(4) 0.7342(3) 0.7234(3) 0.0763(11) Uani 1 1 d U . . 
H9BA H -0.1529 0.7042 0.6964 0.092 Uiso 1 1 calc R C . 
H9BB H -0.0747 0.6879 0.7735 0.092 Uiso 1 1 calc R . . 
C10B C -0.0858(4) 0.9705(3) 0.6531(3) 0.0700(10) Uani 1 1 d U . . 
H10E H -0.1417 1.0328 0.6759 0.084 Uiso 1 1 calc R C . 
H10F H -0.0235 0.9853 0.6086 0.084 Uiso 1 1 calc R . . 
S1C S 0.61277(8) 0.17415(7) 0.89640(7) 0.0646(3) Uani 1 1 d DU . . 
O1C O 0.2229(3) 0.5192(2) 0.72253(15) 0.0832(9) Uani 1 1 d DU . . 
H1C H 0.2689 0.4845 0.6832 0.125 Uiso 1 1 calc RD . . 
O2C O 0.51298(19) 0.27044(15) 0.86337(14) 0.0520(6) Uani 1 1 d U D . 
O3C O 0.6873(3) 0.1345(2) 0.8179(2) 0.0852(9) Uani 1 1 d U D . 
O4C O 0.6705(3) 0.2002(3) 0.9595(2) 0.1051(11) Uani 1 1 d U D . 
C1C C 0.3024(3) 0.3390(2) 0.9313(2) 0.0469(7) Uani 1 1 d U D . 
H1C1 H 0.3020 0.2709 0.9492 0.056 Uiso 1 1 calc R . . 
C2C C 0.4272(3) 0.3398(2) 0.92962(19) 0.0447(7) Uani 1 1 d U . . 
H2C H 0.4511 0.3176 0.9905 0.054 Uiso 1 1 calc R D . 
C3C C 0.4320(3) 0.4429(2) 0.8988(2) 0.0477(7) Uani 1 1 d U D . 
H3C H 0.5140 0.4416 0.8965 0.057 Uiso 1 1 calc R . . 
C4C C 0.3918(3) 0.4797(2) 0.8051(2) 0.0520(8) Uani 1 1 d U . . 
H4CA H 0.3940 0.5464 0.7863 0.062 Uiso 1 1 calc R D . 
H4CB H 0.4462 0.4355 0.7608 0.062 Uiso 1 1 calc R . . 
C5C C 0.2650(3) 0.4816(2) 0.8089(2) 0.0519(8) Uani 1 1 d DU D . 
C6C C 0.1791(3) 0.5516(3) 0.8781(2) 0.0591(9) Uani 1 1 d U . . 
H6CA H 0.0979 0.5532 0.8802 0.071 Uiso 1 1 calc R D . 
H6CB H 0.1793 0.6190 0.8601 0.071 Uiso 1 1 calc R . . 
C7C C 0.2183(3) 0.5149(2) 0.9723(2) 0.0515(8) Uani 1 1 d U D . 
H7C H 0.1633 0.5601 1.0166 0.062 Uiso 1 1 calc R . . 
C8C C 0.2159(3) 0.4092(3) 1.0009(2) 0.0565(8) Uani 1 1 d U . . 
H8CA H 0.1350 0.4099 1.0038 0.068 Uiso 1 1 calc R D . 
H8CB H 0.2401 0.3858 1.0608 0.068 Uiso 1 1 calc R . . 
C9C C 0.2630(3) 0.3766(2) 0.8374(2) 0.0512(8) Uani 1 1 d U . . 
H9CA H 0.3167 0.3319 0.7932 0.061 Uiso 1 1 calc R D . 
H9CB H 0.1823 0.3771 0.8392 0.061 Uiso 1 1 calc R . . 
C10C C 0.3455(3) 0.5123(3) 0.9691(2) 0.0560(8) Uani 1 1 d U . . 
H10G H 0.3705 0.4884 1.0287 0.067 Uiso 1 1 calc R D . 
H10H H 0.3475 0.5794 0.9528 0.067 Uiso 1 1 calc R . . 
C11C C 0.5436(6) 0.1025(5) 0.9677(6) 0.081(3) Uiso 0.674(17) 1 d PDU D 1 
H11M H 0.6029 0.0400 0.9866 0.121 Uiso 0.674(17) 1 calc PR D 1 
H11N H 0.4893 0.0899 0.9367 0.121 Uiso 0.674(17) 1 calc PR D 1 
H11O H 0.4995 0.1368 1.0201 0.121 Uiso 0.674(17) 1 calc PR D 1 
C1CY C 0.5345(13) 0.0885(11) 0.9138(15) 0.092(6) Uiso 0.326(17) 1 d PDU D 2 
H11P H 0.5892 0.0217 0.9275 0.138 Uiso 0.326(17) 1 calc PR D 2 
H11Q H 0.5020 0.0915 0.8596 0.138 Uiso 0.326(17) 1 calc PR D 2 
H11R H 0.4702 0.1061 0.9637 0.138 Uiso 0.326(17) 1 calc PR D 2 
 
loop_ 
 _atom_site_aniso_label 
 _atom_site_aniso_U_11 
 _atom_site_aniso_U_22 
 _atom_site_aniso_U_33 
 _atom_site_aniso_U_23 
 _atom_site_aniso_U_13 
 _atom_site_aniso_U_12 
S1 0.0642(5) 0.0379(4) 0.0535(5) -0.0098(4) -0.0134(4) -0.0024(4) 
O1 0.092(5) 0.062(6) 0.051(3) -0.013(3) -0.038(3) 0.004(4) 
O1Z 0.105(12) 0.066(8) 0.055(5) -0.033(4) -0.044(6) 0.027(6) 
O2 0.0722(15) 0.0447(12) 0.0360(11) -0.0095(9) -0.0068(10) 0.0067(11) 
O3 0.0842(18) 0.0547(14) 0.0701(16) 0.0072(12) -0.0130(14) -0.0322(14) 
O4 0.102(2) 0.0604(16) 0.0816(19) -0.0378(15) -0.0222(16) 0.0165(15) 
C1 0.0470(18) 0.0474(17) 0.0504(18) -0.0089(14) -0.0056(14) -0.0157(14) 
C2 0.0516(18) 0.0391(15) 0.0323(14) -0.0122(12) -0.0056(13) -0.0027(13) 
C3 0.060(2) 0.0556(19) 0.0517(18) -0.0156(15) 0.0030(16) -0.0253(17) 
C4 0.051(2) 0.081(2) 0.072(2) -0.0370(19) -0.0138(18) -0.0125(19) 
C5 0.068(2) 0.070(2) 0.0400(17) -0.0176(16) -0.0267(16) 0.0166(18) 
C6 0.077(3) 0.069(2) 0.058(2) -0.0272(18) -0.0271(19) 0.023(2) 
C7 0.057(2) 0.0549(19) 0.0454(18) -0.0243(15) -0.0098(15) 0.0078(16) 
C8 0.072(2) 0.0434(17) 0.0558(19) -0.0141(15) -0.0115(17) -0.0176(16) 
C9 0.079(2) 0.0437(18) 0.0391(17) -0.0019(14) 0.0008(16) -0.0104(17) 
C10 0.049(2) 0.081(3) 0.055(2) -0.0247(18) 0.0072(16) -0.0183(18) 
C11 0.057(2) 0.070(3) 0.079(3) -0.008(2) -0.006(2) -0.0164(19) 
S1A 0.0577(5) 0.0753(6) 0.0360(4) -0.0131(4) -0.0131(4) 0.0003(4) 
O1A 0.090(2) 0.0685(17) 0.0421(13) -0.0203(12) -0.0150(13) 0.0335(14) 
O2A 0.0733(16) 0.0636(15) 0.0369(12) -0.0130(11) -0.0200(11) 0.0168(12) 
O3A 0.090(2) 0.125(3) 0.0468(15) -0.0101(16) -0.0326(15) 0.0237(19) 
O4A 0.0762(19) 0.088(2) 0.0840(19) -0.0271(16) -0.0105(15) -0.0318(16) 
C1A 0.059(2) 0.0477(18) 0.0522(19) -0.0063(14) -0.0166(15) -0.0131(15) 
C2A 0.0536(19) 0.0463(17) 0.0338(15) -0.0057(13) -0.0123(13) 0.0072(14) 
C3A 0.0432(17) 0.0543(19) 0.0447(17) 0.0010(14) -0.0047(14) -0.0080(14) 
C4A 0.066(2) 0.0437(17) 0.0493(18) -0.0020(14) -0.0188(16) -0.0110(15) 
C5A 0.0558(19) 0.0475(18) 0.0351(16) -0.0111(13) -0.0080(14) 0.0080(15) 
C6A 0.069(2) 0.056(2) 0.0372(17) -0.0078(14) -0.0137(15) 0.0026(17) 
C7A 0.062(2) 0.0484(18) 0.0364(16) -0.0005(13) -0.0167(15) 0.0034(15) 
C8A 0.065(2) 0.0469(18) 0.0490(19) 0.0005(15) -0.0079(16) -0.0094(16) 
C9A 0.0442(18) 0.068(2) 0.0445(18) 0.0008(15) -0.0062(14) -0.0093(16) 
C10A 0.0464(19) 0.060(2) 0.057(2) -0.0077(16) -0.0155(15) -0.0035(15) 
C11A 0.072(3) 0.075(3) 0.056(2) -0.0029(19) -0.0038(19) -0.020(2) 
S1B 0.1158(9) 0.0596(6) 0.0404(5) -0.0080(4) 0.0109(5) -0.0278(6) 
O1B 0.095(8) 0.056(4) 0.042(4) -0.012(3) -0.019(4) 0.015(4) 
O1BZ 0.136(10) 0.060(6) 0.047(4) -0.013(4) -0.022(5) 0.041(6) 
O2B 0.0855(18) 0.0478(13) 0.0431(12) -0.0063(10) -0.0128(12) -0.0062(12) 
O3B 0.109(2) 0.091(2) 0.0575(16) 0.0136(14) -0.0287(15) -0.0488(18) 
O4B 0.096(4) 0.059(3) 0.062(3) -0.003(2) 0.027(2) -0.006(2) 
C1B 0.050(2) 0.062(2) 0.074(2) 0.0138(18) -0.0154(17) -0.0217(17) 
C2B 0.064(2) 0.0380(16) 0.0454(17) -0.0023(13) -0.0062(15) -0.0019(15) 
C3B 0.072(2) 0.064(2) 0.060(2) 0.0071(17) -0.0190(18) -0.0360(19) 
C4B 0.0422(19) 0.095(3) 0.050(2) 0.0097(19) -0.0030(15) 0.0001(18) 
C5B 0.100(3) 0.056(2) 0.047(2) -0.0201(17) -0.0316(19) 0.031(2) 
C6B 0.112(3) 0.069(2) 0.050(2) -0.0103(18) -0.036(2) 0.024(2) 
C7B 0.064(2) 0.052(2) 0.053(2) 0.0052(16) -0.0219(17) 0.0034(17) 
C8B 0.056(2) 0.072(3) 0.091(3) 0.015(2) -0.032(2) -0.0091(19) 
C9B 0.113(3) 0.047(2) 0.081(3) 0.0017(18) -0.053(2) -0.026(2) 
C10B 0.080(3) 0.060(2) 0.064(2) 0.0124(18) -0.005(2) -0.027(2) 
S1C 0.0496(5) 0.0546(5) 0.0653(6) 0.0036(4) -0.0037(4) 0.0023(4) 
O1C 0.095(2) 0.0742(17) 0.0382(13) -0.0147(12) -0.0279(13) 0.0300(15) 
O2C 0.0535(13) 0.0441(12) 0.0437(12) -0.0054(9) -0.0067(10) -0.0004(10) 
O3C 0.0730(18) 0.0643(17) 0.093(2) -0.0267(15) 0.0089(16) 0.0014(14) 
O4C 0.077(2) 0.133(3) 0.079(2) -0.0096(19) -0.0300(17) 0.0003(19) 
C1C 0.0494(18) 0.0448(17) 0.0452(17) -0.0056(13) -0.0015(14) -0.0175(14) 
C2C 0.0465(17) 0.0472(17) 0.0312(14) -0.0052(12) -0.0075(12) -0.0049(14) 
C3C 0.0476(18) 0.0527(18) 0.0481(17) -0.0126(14) -0.0061(14) -0.0210(15) 
C4C 0.069(2) 0.0361(16) 0.0413(16) -0.0049(13) 0.0039(15) -0.0135(15) 
C5C 0.058(2) 0.0488(17) 0.0329(15) -0.0086(13) -0.0154(14) 0.0046(15) 
C6C 0.062(2) 0.0543(19) 0.0429(17) -0.0146(15) -0.0132(15) 0.0056(16) 
C7C 0.0539(19) 0.0550(19) 0.0362(16) -0.0190(14) -0.0052(14) -0.0036(15) 
C8C 0.0501(19) 0.069(2) 0.0425(17) -0.0076(15) 0.0007(14) -0.0159(17) 
C9C 0.0456(18) 0.0580(19) 0.0513(18) -0.0222(15) -0.0099(14) -0.0117(15) 
C10C 0.068(2) 0.0544(19) 0.0469(18) -0.0170(15) -0.0114(16) -0.0169(17) 
 
_geom_special_details 
; 
 All esds (except the esd in the dihedral angle between two l.s. planes) 
 are estimated using the full covariance matrix.  The cell esds are taken 
 into account individually in the estimation of esds in distances, angles 
 and torsion angles; correlations between esds in cell parameters are only 
 used when they are defined by crystal symmetry.  An approximate (isotropic) 
 treatment of cell esds is used for estimating esds involving l.s. planes. 
; 
 
loop_ 
 _geom_bond_atom_site_label_1 
 _geom_bond_atom_site_label_2 
 _geom_bond_distance 
 _geom_bond_site_symmetry_2 
 _geom_bond_publ_flag 
S1 O4 1.414(3) . ? 
S1 O3 1.426(3) . ? 
S1 O2 1.555(2) . ? 
S1 C11 1.745(4) . ? 
O1 C5 1.462(7) . ? 
O1Z C5 1.478(12) . ? 
O2 C2 1.490(3) . ? 
C1 C2 1.506(4) . ? 
C1 C9 1.524(4) . ? 
C1 C8 1.538(4) . ? 
C2 C3 1.500(5) . ? 
C3 C4 1.518(5) . ? 
C3 C10 1.534(4) . ? 
C4 C5 1.514(6) . ? 
C5 C9 1.519(5) . ? 
C5 C6 1.529(5) . ? 
C6 C7 1.526(5) . ? 
C7 C10 1.516(5) . ? 
C7 C8 1.520(5) . ? 
S1A O3A 1.410(3) . ? 
S1A O4A 1.423(3) . ? 
S1A O2A 1.560(2) . ? 
S1A C11A 1.744(4) . ? 
O1A C5A 1.436(3) . ? 
O2A C2A 1.485(3) . ? 
C1A C2A 1.512(5) . ? 
C1A C9A 1.530(4) . ? 
C1A C8A 1.533(4) . ? 
C2A C3A 1.508(5) . ? 
C3A C10A 1.530(4) . ? 
C3A C4A 1.533(4) . ? 
C4A C5A 1.517(5) . ? 
C5A C9A 1.512(5) . ? 
C5A C6A 1.524(4) . ? 
C6A C7A 1.526(4) . ? 
C7A C8A 1.522(5) . ? 
C7A C10A 1.528(5) . ? 
S1B O3B 1.384(3) . ? 
S1B O4BZ 1.391(9) . ? 
S1B O4B 1.503(5) . ? 
S1B O2B 1.541(2) . ? 
S1B C11B 1.650(7) . ? 
S1B C1BZ 1.883(9) . ? 
O1B C5B 1.477(8) . ? 
O1BZ C5B 1.492(10) . ? 
O2B C2B 1.487(4) . ? 
C1B C2B 1.492(5) . ? 
C1B C9B 1.503(5) . ? 
C1B C8B 1.533(5) . ? 
C2B C3B 1.508(5) . ? 
C3B C4B 1.523(5) . ? 
C3B C10B 1.537(5) . ? 
C4B C5B 1.512(6) . ? 
C5B C9B 1.508(6) . ? 
C5B C6B 1.533(5) . ? 
C6B C7B 1.521(5) . ? 
C7B C10B 1.511(5) . ? 
C7B C8B 1.515(5) . ? 
S1C O3C 1.400(3) . ? 
S1C O4C 1.452(4) . ? 
S1C O2C 1.546(2) . ? 
S1C C11C 1.693(6) . ? 
S1C C1CY 1.786(11) . ? 
O1C C5C 1.436(3) . ? 
O2C C2C 1.491(3) . ? 
C1C C2C 1.513(4) . ? 
C1C C9C 1.527(4) . ? 
C1C C8C 1.534(4) . ? 
C2C C3C 1.508(4) . ? 
C3C C4C 1.527(4) . ? 
C3C C10C 1.534(4) . ? 
C4C C5C 1.515(5) . ? 
C5C C9C 1.520(5) . ? 
C5C C6C 1.525(4) . ? 
C6C C7C 1.529(4) . ? 
C7C C10C 1.519(5) . ? 
C7C C8C 1.529(5) . ? 
 
loop_ 
 _geom_angle_atom_site_label_1 
 _geom_angle_atom_site_label_2 
 _geom_angle_atom_site_label_3 
 _geom_angle 
 _geom_angle_site_symmetry_1 
 _geom_angle_site_symmetry_3 
 _geom_angle_publ_flag 
O4 S1 O3 118.42(19) . . ? 
O4 S1 O2 105.30(15) . . ? 
O3 S1 O2 110.52(15) . . ? 
O4 S1 C11 109.9(2) . . ? 
O3 S1 C11 107.86(18) . . ? 
O2 S1 C11 103.90(17) . . ? 
C2 O2 S1 119.30(18) . . ? 
C2 C1 C9 110.2(3) . . ? 
C2 C1 C8 107.1(3) . . ? 
C9 C1 C8 109.6(3) . . ? 
O2 C2 C3 109.5(2) . . ? 
O2 C2 C1 107.6(2) . . ? 
C3 C2 C1 111.3(3) . . ? 
C2 C3 C4 110.4(3) . . ? 
C2 C3 C10 107.3(3) . . ? 
C4 C3 C10 109.8(3) . . ? 
C5 C4 C3 109.6(3) . . ? 
O1 C5 O1Z 27.1(10) . . ? 
O1 C5 C4 101.2(9) . . ? 
O1Z C5 C4 126.1(15) . . ? 
O1 C5 C9 118.9(8) . . ? 
O1Z C5 C9 97.0(16) . . ? 
C4 C5 C9 109.2(3) . . ? 
O1 C5 C6 107.9(6) . . ? 
O1Z C5 C6 103.9(7) . . ? 
C4 C5 C6 110.1(3) . . ? 
C9 C5 C6 109.2(3) . . ? 
C7 C6 C5 109.2(3) . . ? 
C10 C7 C8 108.8(3) . . ? 
C10 C7 C6 109.7(3) . . ? 
C8 C7 C6 110.2(3) . . ? 
C7 C8 C1 109.2(3) . . ? 
C5 C9 C1 109.8(3) . . ? 
C7 C10 C3 109.5(3) . . ? 
O3A S1A O4A 119.3(2) . . ? 
O3A S1A O2A 104.72(15) . . ? 
O4A S1A O2A 110.50(16) . . ? 
O3A S1A C11A 109.5(2) . . ? 
O4A S1A C11A 107.71(19) . . ? 
O2A S1A C11A 104.13(18) . . ? 
C2A O2A S1A 119.47(19) . . ? 
C2A C1A C9A 110.4(3) . . ? 
C2A C1A C8A 107.0(3) . . ? 
C9A C1A C8A 109.9(3) . . ? 
O2A C2A C3A 107.7(3) . . ? 
O2A C2A C1A 109.5(3) . . ? 
C3A C2A C1A 111.1(3) . . ? 
C2A C3A C10A 107.4(3) . . ? 
C2A C3A C4A 110.4(3) . . ? 
C10A C3A C4A 109.3(3) . . ? 
C5A C4A C3A 109.8(3) . . ? 
O1A C5A C9A 110.7(3) . . ? 
O1A C5A C4A 110.8(3) . . ? 
C9A C5A C4A 109.6(3) . . ? 
O1A C5A C6A 106.8(2) . . ? 
C9A C5A C6A 109.6(3) . . ? 
C4A C5A C6A 109.3(3) . . ? 
C5A C6A C7A 109.9(3) . . ? 
C8A C7A C6A 109.9(3) . . ? 
C8A C7A C10A 108.8(3) . . ? 
C6A C7A C10A 109.4(3) . . ? 
C7A C8A C1A 109.4(3) . . ? 
C5A C9A C1A 109.7(3) . . ? 
C7A C10A C3A 109.5(3) . . ? 
O3B S1B O4BZ 132.7(4) . . ? 
O3B S1B O4B 110.9(2) . . ? 
O4BZ S1B O4B 48.2(4) . . ? 
O3B S1B O2B 107.47(16) . . ? 
O4BZ S1B O2B 118.2(4) . . ? 
O4B S1B O2B 103.8(2) . . ? 
O3B S1B C11B 122.0(4) . . ? 
O4BZ S1B C11B 56.2(5) . . ? 
O4B S1B C11B 104.3(4) . . ? 
O2B S1B C11B 107.0(3) . . ? 
O3B S1B C1BZ 92.6(4) . . ? 
O4BZ S1B C1BZ 91.6(6) . . ? 
O4B S1B C1BZ 139.5(4) . . ? 
O2B S1B C1BZ 99.6(4) . . ? 
C11B S1B C1BZ 36.5(4) . . ? 
C2B O2B S1B 121.5(2) . . ? 
C2B C1B C9B 110.2(3) . . ? 
C2B C1B C8B 107.3(3) . . ? 
C9B C1B C8B 110.3(3) . . ? 
O2B C2B C1B 107.4(3) . . ? 
O2B C2B C3B 108.8(3) . . ? 
C1B C2B C3B 111.2(3) . . ? 
C2B C3B C4B 109.4(3) . . ? 
C2B C3B C10B 107.7(3) . . ? 
C4B C3B C10B 109.5(3) . . ? 
C5B C4B C3B 109.9(3) . . ? 
O1B C5B O1BZ 34.1(6) . . ? 
O1B C5B C9B 96.3(9) . . ? 
O1BZ C5B C9B 127.4(12) . . ? 
O1B C5B C4B 122.6(7) . . ? 
O1BZ C5B C4B 94.8(12) . . ? 
C9B C5B C4B 109.5(3) . . ? 
O1B C5B C6B 108.5(5) . . ? 
O1BZ C5B C6B 104.1(5) . . ? 
C9B C5B C6B 110.6(4) . . ? 
C4B C5B C6B 108.6(4) . . ? 
C7B C6B C5B 109.0(3) . . ? 
C10B C7B C8B 108.2(3) . . ? 
C10B C7B C6B 110.3(3) . . ? 
C8B C7B C6B 110.2(4) . . ? 
C7B C8B C1B 109.7(3) . . ? 
C1B C9B C5B 109.6(3) . . ? 
C7B C10B C3B 109.2(3) . . ? 
O3C S1C O4C 115.8(2) . . ? 
O3C S1C O2C 106.22(16) . . ? 
O4C S1C O2C 108.17(17) . . ? 
O3C S1C C11C 118.1(3) . . ? 
O4C S1C C11C 100.8(4) . . ? 
O2C S1C C11C 107.2(3) . . ? 
O3C S1C C1CY 94.4(7) . . ? 
O4C S1C C1CY 129.9(7) . . ? 
O2C S1C C1CY 99.5(5) . . ? 
C11C S1C C1CY 29.9(6) . . ? 
C2C O2C S1C 120.58(18) . . ? 
C2C C1C C9C 110.0(3) . . ? 
C2C C1C C8C 107.9(3) . . ? 
C9C C1C C8C 109.3(3) . . ? 
O2C C2C C3C 107.9(2) . . ? 
O2C C2C C1C 108.6(2) . . ? 
C3C C2C C1C 111.2(3) . . ? 
C2C C3C C4C 110.3(3) . . ? 
C2C C3C C10C 106.9(3) . . ? 
C4C C3C C10C 109.7(3) . . ? 
C5C C4C C3C 109.9(3) . . ? 
O1C C5C C4C 111.2(3) . . ? 
O1C C5C C9C 110.3(3) . . ? 
C4C C5C C9C 109.2(2) . . ? 
O1C C5C C6C 107.0(2) . . ? 
C4C C5C C6C 109.8(3) . . ? 
C9C C5C C6C 109.3(3) . . ? 
C5C C6C C7C 109.6(3) . . ? 
C10C C7C C6C 109.8(3) . . ? 
C10C C7C C8C 109.0(3) . . ? 
C6C C7C C8C 109.5(3) . . ? 
C7C C8C C1C 109.1(3) . . ? 
C5C C9C C1C 110.0(2) . . ? 
C7C C10C C3C 109.9(3) . . ? 
 
loop_ 
 _geom_torsion_atom_site_label_1 
 _geom_torsion_atom_site_label_2 
 _geom_torsion_atom_site_label_3 
 _geom_torsion_atom_site_label_4 
 _geom_torsion 
 _geom_torsion_site_symmetry_1 
 _geom_torsion_site_symmetry_2 
 _geom_torsion_site_symmetry_3 
 _geom_torsion_site_symmetry_4 
 _geom_torsion_publ_flag 
O4 S1 O2 C2 -171.8(3) . . . . ? 
O3 S1 O2 C2 -42.8(3) . . . . ? 
C11 S1 O2 C2 72.7(3) . . . . ? 
S1 O2 C2 C3 102.6(3) . . . . ? 
S1 O2 C2 C1 -136.3(2) . . . . ? 
C9 C1 C2 O2 -63.5(3) . . . . ? 
C8 C1 C2 O2 177.3(2) . . . . ? 
C9 C1 C2 C3 56.5(3) . . . . ? 
C8 C1 C2 C3 -62.7(3) . . . . ? 
O2 C2 C3 C4 61.7(3) . . . . ? 
C1 C2 C3 C4 -57.1(3) . . . . ? 
O2 C2 C3 C10 -178.6(3) . . . . ? 
C1 C2 C3 C10 62.5(3) . . . . ? 
C2 C3 C4 C5 58.9(4) . . . . ? 
C10 C3 C4 C5 -59.3(4) . . . . ? 
C3 C4 C5 O1 173.5(6) . . . . ? 
C3 C4 C5 O1Z -174.7(13) . . . . ? 
C3 C4 C5 C9 -60.3(4) . . . . ? 
C3 C4 C5 C6 59.6(4) . . . . ? 
O1 C5 C6 C7 -169.2(10) . . . . ? 
O1Z C5 C6 C7 163.0(18) . . . . ? 
C4 C5 C6 C7 -59.5(5) . . . . ? 
C9 C5 C6 C7 60.3(5) . . . . ? 
C5 C6 C7 C10 59.5(5) . . . . ? 
C5 C6 C7 C8 -60.2(5) . . . . ? 
C10 C7 C8 C1 -61.1(3) . . . . ? 
C6 C7 C8 C1 59.3(4) . . . . ? 
C2 C1 C8 C7 60.8(3) . . . . ? 
C9 C1 C8 C7 -58.8(4) . . . . ? 
O1 C5 C9 C1 175.2(8) . . . . ? 
O1Z C5 C9 C1 -168.0(10) . . . . ? 
C4 C5 C9 C1 59.9(3) . . . . ? 
C6 C5 C9 C1 -60.5(4) . . . . ? 
C2 C1 C9 C5 -57.8(3) . . . . ? 
C8 C1 C9 C5 59.9(4) . . . . ? 
C8 C7 C10 C3 61.0(4) . . . . ? 
C6 C7 C10 C3 -59.6(4) . . . . ? 
C2 C3 C10 C7 -60.6(4) . . . . ? 
C4 C3 C10 C7 59.4(4) . . . . ? 
O3A S1A O2A C2A 178.3(3) . . . . ? 
O4A S1A O2A C2A 48.7(3) . . . . ? 
C11A S1A O2A C2A -66.7(3) . . . . ? 
S1A O2A C2A C3A 128.5(3) . . . . ? 
S1A O2A C2A C1A -110.6(3) . . . . ? 
C9A C1A C2A O2A -62.0(3) . . . . ? 
C8A C1A C2A O2A 178.4(2) . . . . ? 
C9A C1A C2A C3A 56.7(3) . . . . ? 
C8A C1A C2A C3A -62.9(3) . . . . ? 
O2A C2A C3A C10A -177.6(2) . . . . ? 
C1A C2A C3A C10A 62.6(3) . . . . ? 
O2A C2A C3A C4A 63.3(3) . . . . ? 
C1A C2A C3A C4A -56.5(3) . . . . ? 
C2A C3A C4A C5A 58.0(3) . . . . ? 
C10A C3A C4A C5A -59.9(4) . . . . ? 
C3A C4A C5A O1A 177.6(3) . . . . ? 
C3A C4A C5A C9A -59.9(3) . . . . ? 
C3A C4A C5A C6A 60.1(4) . . . . ? 
O1A C5A C6A C7A 179.9(3) . . . . ? 
C9A C5A C6A C7A 59.8(4) . . . . ? 
C4A C5A C6A C7A -60.2(4) . . . . ? 
C5A C6A C7A C8A -59.5(4) . . . . ? 
C5A C6A C7A C10A 59.9(4) . . . . ? 
C6A C7A C8A C1A 58.7(4) . . . . ? 
C10A C7A C8A C1A -61.1(3) . . . . ? 
C2A C1A C8A C7A 61.2(3) . . . . ? 
C9A C1A C8A C7A -58.7(4) . . . . ? 
O1A C5A C9A C1A -177.4(3) . . . . ? 
C4A C5A C9A C1A 60.1(3) . . . . ? 
C6A C5A C9A C1A -59.8(3) . . . . ? 
C2A C1A C9A C5A -58.4(3) . . . . ? 
C8A C1A C9A C5A 59.5(4) . . . . ? 
C8A C7A C10A C3A 60.6(3) . . . . ? 
C6A C7A C10A C3A -59.5(4) . . . . ? 
C2A C3A C10A C7A -60.4(3) . . . . ? 
C4A C3A C10A C7A 59.4(4) . . . . ? 
O3B S1B O2B C2B 166.1(3) . . . . ? 
O4BZ S1B O2B C2B -1.0(6) . . . . ? 
O4B S1B O2B C2B 48.6(3) . . . . ? 
C11B S1B O2B C2B -61.3(4) . . . . ? 
C1BZ S1B O2B C2B -98.1(4) . . . . ? 
S1B O2B C2B C1B -123.6(3) . . . . ? 
S1B O2B C2B C3B 116.0(3) . . . . ? 
C9B C1B C2B O2B -60.5(4) . . . . ? 
C8B C1B C2B O2B 179.4(3) . . . . ? 
C9B C1B C2B C3B 58.4(4) . . . . ? 
C8B C1B C2B C3B -61.7(4) . . . . ? 
O2B C2B C3B C4B 60.7(4) . . . . ? 
C1B C2B C3B C4B -57.3(4) . . . . ? 
O2B C2B C3B C10B 179.7(3) . . . . ? 
C1B C2B C3B C10B 61.6(4) . . . . ? 
C2B C3B C4B C5B 57.7(4) . . . . ? 
C10B C3B C4B C5B -60.2(4) . . . . ? 
C3B C4B C5B O1B -171.0(9) . . . . ? 
C3B C4B C5B O1BZ 167.9(8) . . . . ? 
C3B C4B C5B C9B -59.5(4) . . . . ? 
C3B C4B C5B C6B 61.3(4) . . . . ? 
O1B C5B C6B C7B 163.6(10) . . . . ? 
O1BZ C5B C6B C7B -161.1(14) . . . . ? 
C9B C5B C6B C7B 59.1(5) . . . . ? 
C4B C5B C6B C7B -61.0(5) . . . . ? 
C5B C6B C7B C10B 60.8(5) . . . . ? 
C5B C6B C7B C8B -58.6(5) . . . . ? 
C10B C7B C8B C1B -62.0(4) . . . . ? 
C6B C7B C8B C1B 58.6(4) . . . . ? 
C2B C1B C8B C7B 61.4(4) . . . . ? 
C9B C1B C8B C7B -58.7(4) . . . . ? 
C2B C1B C9B C5B -59.3(4) . . . . ? 
C8B C1B C9B C5B 59.0(4) . . . . ? 
O1B C5B C9B C1B -172.0(5) . . . . ? 
O1BZ C5B C9B C1B 172.6(11) . . . . ? 
C4B C5B C9B C1B 60.0(4) . . . . ? 
C6B C5B C9B C1B -59.6(4) . . . . ? 
C8B C7B C10B C3B 61.4(4) . . . . ? 
C6B C7B C10B C3B -59.2(4) . . . . ? 
C2B C3B C10B C7B -60.5(4) . . . . ? 
C4B C3B C10B C7B 58.4(4) . . . . ? 
O3C S1C O2C C2C -171.4(2) . . . . ? 
O4C S1C O2C C2C -46.4(3) . . . . ? 
C11C S1C O2C C2C 61.5(4) . . . . ? 
C1CY S1C O2C C2C 91.2(8) . . . . ? 
S1C O2C C2C C3C 125.3(2) . . . . ? 
S1C O2C C2C C1C -114.1(2) . . . . ? 
C9C C1C C2C O2C -61.8(3) . . . . ? 
C8C C1C C2C O2C 179.0(2) . . . . ? 
C9C C1C C2C C3C 56.8(3) . . . . ? 
C8C C1C C2C C3C -62.4(3) . . . . ? 
O2C C2C C3C C4C 62.1(3) . . . . ? 
C1C C2C C3C C4C -56.9(3) . . . . ? 
O2C C2C C3C C10C -178.7(2) . . . . ? 
C1C C2C C3C C10C 62.3(3) . . . . ? 
C2C C3C C4C C5C 58.5(3) . . . . ? 
C10C C3C C4C C5C -58.9(3) . . . . ? 
C3C C4C C5C O1C 178.0(2) . . . . ? 
C3C C4C C5C C9C -60.1(3) . . . . ? 
C3C C4C C5C C6C 59.7(3) . . . . ? 
O1C C5C C6C C7C 179.4(3) . . . . ? 
C4C C5C C6C C7C -59.8(4) . . . . ? 
C9C C5C C6C C7C 60.0(4) . . . . ? 
C5C C6C C7C C10C 59.4(4) . . . . ? 
C5C C6C C7C C8C -60.3(4) . . . . ? 
C10C C7C C8C C1C -60.1(3) . . . . ? 
C6C C7C C8C C1C 60.0(4) . . . . ? 
C2C C1C C8C C7C 59.9(3) . . . . ? 
C9C C1C C8C C7C -59.7(3) . . . . ? 
O1C C5C C9C C1C -177.4(3) . . . . ? 
C4C C5C C9C C1C 60.1(3) . . . . ? 
C6C C5C C9C C1C -60.1(3) . . . . ? 
C2C C1C C9C C5C -58.2(3) . . . . ? 
C8C C1C C9C C5C 60.1(3) . . . . ? 
C6C C7C C10C C3C -58.8(4) . . . . ? 
C8C C7C C10C C3C 61.1(3) . . . . ? 
C2C C3C C10C C7C -61.0(3) . . . . ? 
C4C C3C C10C C7C 58.6(4) . . . . ? 
 
loop_ 
 _geom_hbond_atom_site_label_D 
 _geom_hbond_atom_site_label_H 
 _geom_hbond_atom_site_label_A 
 _geom_hbond_distance_DH 
 _geom_hbond_distance_HA 
 _geom_hbond_distance_DA 
 _geom_hbond_angle_DHA 
 _geom_hbond_site_symmetry_A 
O1 H1 O1B  0.82 2.06 2.86(2) 162.9 . 
O1Z H1Z O1BZ  0.82 1.99 2.75(2) 155.4 . 
O1A H1A O1Z  0.82 1.89 2.675(12) 161.4 . 
O1A H1A O1  0.82 1.99 2.773(13) 160.0 . 
O1B H1B O1C  0.82 2.04 2.791(11) 153.8 . 
O1BZ H1BZ O1C  0.81 2.11 2.744(10) 134.8 . 
O1C H1C O1A  0.82 1.93 2.728(3) 162.6 . 
 
_diffrn_measured_fraction_theta_max    1.000 
_diffrn_reflns_theta_full              24.97 
_diffrn_measured_fraction_theta_full   1.000 
_refine_diff_density_max    0.702 
_refine_diff_density_min   -0.580 
_refine_diff_density_rms    0.052 
